# Supplementary material for: Prevalence and incidence of noncystic fibrosis bronchiectasis among US adults in 2013
Source: PubMed Central journal article supplement (PMC5729734; doi:10.1177/1479972317709649), 2017-05-30
Supplement: Epidemiology_of_BrE_in_US_Clinical_Practice_v2.pdf [file Epidemiology_of_BrE_in_US_Clinical_Practice_v2.pdf]

**Online Supplement for Prevalence and Incidence of Non-Cystic Fibrosis Bronchiectasis among US  
Adults in 2013:  
Study Methods**

**METHODS**

**Study Design and Data Source**

This study employed a retrospective design and data from the Truven Health Analytics MarketScan® Commercial Claims and Encounters (CCAЕ) and Medicare Supplemental and Coordination of Benefits (MDCR) databases (hereinafter, the “MarketScan Database”). The CCAЕ database contains data on the health insurance claims of employees of large, self-insured corporations and their dependents, along with data from a few commercial health plans. The MDCR database contains enrollment information, Medicare claims, and employer-sponsored health insurance claims of Medicare-eligible retirees, and includes only plans where both the Medicare-paid amounts and the employer-paid amounts are available and evident on the claims. The data extract for this study was limited to insurers that provided healthcare claims information to the MarketScan Database during the entire 5-year period from 2009-2013.

Data available from each facility and professional-service claim include dates and places of service, diagnoses, procedures performed/services rendered, and quantity of services (professional-service claims only). Data available from each outpatient pharmacy claim include the drug (class) dispensed, dispensing date, quantity dispensed, and number of days supplied. Medical and pharmacy claims also include amounts paid (i.e., reimbursed) by health plans as well as by patients to providers for services rendered. Selected demographic and eligibility information (including age, sex, geographic region of residence, dates of plan eligibility) is available for all health plan enrollees. All data can be arrayed to provide a detailed chronology of medical and pharmacy services used by each plan member over time.

The study extract was de-identified prior to its release to study investigators, as set forth in the corresponding Data Use Agreement. The MarketScan Database has been evaluated and certified by an independent third party to be in compliance with the Health Insurance Portability and Accountability Act (HIPAA) of 1996 statistical de-identification standards and to satisfy the conditions set forth in Sections 164.514 (a)-(b)1ii of the HIPAA Privacy Rule regarding the determination and documentation of statistically de-identified data. Use of the study extract for health services research is therefore fully compliant with the HIPAA Privacy Rule.

### **Source and Study Populations**

The source population comprised all persons who were aged  $\geq 18$  years and had comprehensive health benefits for  $\geq 1$  day during 2013 (i.e., the referent year). From the source population, all persons who had evidence of bronchiectasis during 2009-2013 were identified based on  $\geq 2$  ambulatory encounters with a diagnosis of bronchiectasis (ICD-9-CM 494.x) and dates of service  $\geq 30$  days apart; one ambulatory encounter with a diagnosis of bronchiectasis, and computed tomography (CT) scan of the thorax (CPT-4 71250, 71260, 71270) within 60 days prior to the encounter; or  $\geq 1$  hospitalization with a principal or secondary diagnosis of bronchiectasis.

Persons who were first flagged as having bronchiectasis in 2013, and who were continuously eligible for comprehensive health benefits for  $\geq 1$  year prior to the date of the first such encounter, were designated as having “newly diagnosed” (i.e., incident) disease. Encounters for “ancillary” services (e.g., laboratory assessments) that may be used to assist in the diagnosis of diseases were excluded from consideration in identifying the source population. Persons who had evidence of bronchiectasis and cystic fibrosis were excluded from the prevalent and incident populations. Case-ascertainment algorithms were largely consistent with methods employed in prior research.<sup>7,9</sup>

Two alternative case-ascertainment algorithms were also employed to evaluate the sensitivity of study results. With the first—which was designed to provide an upper bound on the estimated prevalence of diagnosed bronchiectasis—all persons in the source population who had  $\geq 1$  encounters with a diagnosis of bronchiectasis at any time during 2009-2013 were designated as having prevalent disease. The second—employed for purposes of comparison with prior research—required  $\geq 1$  diagnosis during the referent year.<sup>8</sup>

## **Analyses**

Demographic and clinical characteristics of persons with prevalent and incident (diagnosed) bronchiectasis were descriptively analyzed. The presence of selected comorbidities was identified based on  $\geq 2$  ambulatory encounters ( $\geq 30$  days apart) or  $\geq 1$  hospitalization with a corresponding diagnosis during the two-year period beginning on January 1, 2012 and ending on December 31, 2013.

Disease prevalence was calculated for each age- and sex-specific stratum by dividing the total number of persons with bronchiectasis in 2013 by the total number of persons in the source population (i.e., persons who had at least one day of eligibility for comprehensive health benefits in CY2013). Disease incidence (annual) was calculated for each age- and sex-specific stratum by dividing the total number of persons with newly diagnosed bronchiectasis in 2013 by the total number of persons in the source population who were continuously eligible for comprehensive health benefits in 2013. Confidence intervals for study measures were not reported due to the large sample size and corresponding small standard errors.

Estimated rates of disease prevalence and incidence in the US were calculated by combining age- and sex-specific rates from the analyses described above with corresponding population weights from the US Census.<sup>10</sup> Sensitivity analyses were conducted considering each of the alternative case-ascertainment algorithms, as described above.

**Online Supplement — Table 1.** Selection of source and study populations

| Inclusion Criteria                                                                                           | No. of Persons |
|--------------------------------------------------------------------------------------------------------------|----------------|
| <b>Prevalence</b>                                                                                            |                |
| Source Population                                                                                            |                |
| All persons aged $\geq 18$ years with $\geq 1$ day of comprehensive health benefits during year of interest  | 33,204,504     |
| Study Population                                                                                             |                |
| Persons with BrE in year of interest                                                                         | 31,122         |
| $\geq 2$ ambulatory encounters with diagnosis of BrE separated by $\geq 30$ days; OR                         | 21,284         |
| 1 ambulatory encounter with diagnosis of BrE and CT scan within 60 days; OR                                  | 15,657         |
| $\geq 1$ hospitalization with 1° or 2° diagnosis of BrE                                                      | 8,975          |
| <b>Incidence</b>                                                                                             |                |
| Source Population                                                                                            |                |
| All persons aged $\geq 18$ years continuously eligible for comprehensive health benefits in year of interest | 23,722,415     |
| Study Population                                                                                             |                |
| Persons with Newly Diagnosed BrE in year of interest                                                         | 7,482          |
| $\geq 2$ ambulatory encounters with diagnosis of BrE separated by $\geq 30$ days; OR                         | 3,711          |
| 1 ambulatory encounter with diagnosis of BrE and CT scan within 60 days; OR                                  | 3,806          |
| $\geq 1$ hospitalization with 1° or 2° diagnosis of BrE                                                      | 2,231          |
| Plus continuously eligible for comprehensive health benefits for $\geq 1$ year prior first evidence of BrE   | 5,120          |

BrE: bronchiectasis; CT: computed tomography

\*All available data during CY2009-CY2013 were used to identify persons with BrE in CY2013

**Online Supplement — Table 2.** Demographic characteristics and clinical profile of persons with BrE and persons newly diagnosed with BrE

|                                                    | Persons with BrE  |                                            |                                                  | p-value* |
|----------------------------------------------------|-------------------|--------------------------------------------|--------------------------------------------------|----------|
|                                                    | All<br>(N=31,122) | Excluding Newly<br>Diagnosed<br>(N=26,002) | Persons Newly<br>Diagnosed with BrE<br>(N=5,120) |          |
| <b>Patient Characteristics</b>                     |                   |                                            |                                                  |          |
| Age (years)                                        |                   |                                            |                                                  |          |
| Mean (SD)                                          | 68.2 (14.4)       | 68.3 (14.4)                                | 67.7 (14.1)                                      | 0.004    |
| Median                                             | 69                | 70                                         | 69                                               |          |
| Age Group, years, n (%)                            |                   |                                            |                                                  |          |
| 18-34                                              | 765 (2.5)         | 646 (2.5)                                  | 119 (2.3)                                        | 0.059    |
| 35-44                                              | 1,102 (3.5)       | 928 (3.6)                                  | 174 (3.4)                                        |          |
| 45-54                                              | 2,979 (9.6)       | 2,470 (9.5)                                | 509 (9.9)                                        |          |
| 55-64                                              | 7,438 (23.9)      | 6,142 (23.6)                               | 1,296 (25.3)                                     |          |
| 65-74                                              | 7,107 (22.8)      | 5,890 (22.7)                               | 1,217 (23.8)                                     |          |
| ≥75                                                | 11,731 (37.7)     | 9,926 (38.2)                               | 1,805 (35.3)                                     |          |
| Gender, n (%)                                      |                   |                                            |                                                  |          |
| Female                                             | 20,482 (65.8)     | 17,401 (66.9)                              | 3,081 (60.2)                                     | <0.001   |
| Male                                               | 10,640 (34.2)     | 8,601 (33.1)                               | 2,039 (39.8)                                     |          |
| Geographic Region, n (%)                           |                   |                                            |                                                  |          |
| Midwest                                            | 7,308 (23.5)      | 5,925 (22.8)                               | 1,383 (27.0)                                     | <0.001   |
| South                                              | 8,867 (28.5)      | 7,366 (28.3)                               | 1,501 (29.3)                                     |          |
| Northeast                                          | 6,517 (20.9)      | 5,597 (21.5)                               | 920 (18.0)                                       |          |
| West                                               | 7,669 (24.6)      | 6,475 (24.9)                               | 1,194 (23.3)                                     |          |
| Unknown                                            | 761 (2.4)         | 639 (2.5)                                  | 122 (2.4)                                        |          |
| Payer Type, n (%)                                  |                   |                                            |                                                  |          |
| HMO                                                | 1,829 (5.9)       | 1,532 (5.9)                                | 297 (5.8)                                        | 0.051    |
| PPO                                                | 7,146 (23.0)      | 5,921 (22.8)                               | 1,225 (23.9)                                     |          |
| POS                                                | 957 (3.1)         | 787 (3.0)                                  | 170 (3.3)                                        |          |
| Comprehensive                                      | 484 (1.6)         | 384 (1.5)                                  | 100 (2.0)                                        |          |
| Medicare Risk                                      | 19,054 (61.2)     | 15,984 (61.5)                              | 3,070 (60.0)                                     |          |
| Other                                              | 1,482 (4.8)       | 1,249 (4.8)                                | 233 (4.6)                                        |          |
| Unknown                                            | 170 (0.5)         | 145 (0.6)                                  | 25 (0.5)                                         |          |
| <b>Clinical Profile</b>                            |                   |                                            |                                                  |          |
| Comorbidities, n (%)                               |                   |                                            |                                                  |          |
| Acute Bronchitis                                   | 11,657 (37.5)     | 9,394 (36.1)                               | 2,263 (44.2)                                     | <0.001   |
| COPD                                               | 16,017 (51.5)     | 13,175 (50.7)                              | 2,842 (55.5)                                     | <0.001   |
| Genetic Disorders**                                | 3,146 (10.1)      | 2,771 (10.7)                               | 375 (7.3)                                        | <0.001   |
| Inflammatory Bowel Disease                         | 695 (2.2)         | 574 (2.2)                                  | 121 (2.4)                                        | 0.491    |
| Lung Malignancies                                  | 1,204 (3.9)       | 920 (3.5)                                  | 284 (5.5)                                        | <0.001   |
| Post-Inflammatory Pulmonary Fibrosis               | 4,473 (14.4)      | 3,470 (13.3)                               | 1,003 (19.6)                                     | <0.001   |
| Pulmonary Nontuberculosis Mycobacterial Disease    | 1,988 (6.4)       | 1,747 (6.7)                                | 241 (4.7)                                        | <0.001   |
| Rheumatoid Disease                                 | 2,316 (7.4)       | 1,943 (7.5)                                | 373 (7.3)                                        | 0.641    |
| Evidence of Use of, n (%)                          |                   |                                            |                                                  |          |
| High Freq. Chest Wall Oscillation Air-Pulse System | 740 (2.4)         | 643 (2.5)                                  | 97 (1.9)                                         | 0.013    |
| Electric/Pneumatic Percussor                       | 8 (0.0)           | 8 (0.0)                                    | 0 (0.0)                                          | 0.209    |
| Oscillatory Positive Expiratory Pressure Device    | 510 (1.6)         | 411 (1.6)                                  | 99 (1.9)                                         | 0.069    |
| Respiratory Suction Pump                           | 263 (0.8)         | 214 (0.8)                                  | 49 (1.0)                                         | 0.338    |
| Cough Stimulating Device                           | 11 (0.0)          | 7 (0.0)                                    | 4 (0.1)                                          | 0.075    |
| Nebulizer Compressor                               | 5,492 (17.6)      | 4,441 (17.1)                               | 1,051 (20.5)                                     | <0.001   |
| Bronchoscopy                                       | 4,492 (14.4)      | 3,263 (12.5)                               | 1,229 (24.0)                                     | <0.001   |
| Supplemental Oxygen                                | 7,327 (23.5)      | 6,004 (23.1)                               | 1,323 (25.8)                                     | <0.001   |

BrE: bronchiectasis; COPD: chronic obstructive pulmonary disease

\*Test for differences between persons with BrE (excluding newly diagnosed) and persons newly diagnosed with BrE

\*\*Situs inversus, common variable immunodeficiency, IgG deficiency, allergic bronchopulmonary aspergilliosis, and congenital bronchiectasis

**Online Supplement — Table 3. Prevalence of bronchiectasis among US adults**

|             | Study Database          |                  |               | US (2013)      |                         |                      |
|-------------|-------------------------|------------------|---------------|----------------|-------------------------|----------------------|
|             | Population <sup>†</sup> | Persons with BrE |               | No. of Persons | No. of Persons with BrE | Rate of BrE per 100K |
|             |                         | n                | Rate per 100K |                |                         |                      |
| All Persons | 33,204,504              | 31,122           | 93.7          | 245,273,438    | 339,843                 | 138.6                |
| Age         |                         |                  |               |                |                         |                      |
| 18-34       | 10,744,007              | 765              | 7.1           | 74,980,662     | 5,312                   | 7.1                  |
| 35-44       | 6,191,587               | 1,102            | 17.8          | 40,513,133     | 7,160                   | 17.7                 |
| 45-54       | 6,830,999               | 2,979            | 43.6          | 43,458,851     | 18,772                  | 43.2                 |
| 55-64       | 6,066,557               | 7,438            | 122.6         | 40,077,581     | 48,838                  | 121.9                |
| ≥65         | 3,371,354               | 18,838           | 558.8         | 46,243,211     | 259,761                 | 561.7                |
| 65-74       | 1,919,126               | 7,107            | 370.3         | 26,398,290     | 98,586                  | 373.5                |
| ≥75         | 1,452,228               | 11,731           | 807.8         | 19,844,921     | 161,175                 | 812.2                |
| Men         | 15,884,532              | 10,640           | 67.0          | 119,352,940    | 113,763                 | 95.3                 |
| Age         |                         |                  |               |                |                         |                      |
| 18-34       | 5,255,785               | 323              | 6.1           | 38,095,493     | 2,341                   | 6.1                  |
| 35-44       | 2,975,605               | 417              | 14.0          | 20,159,229     | 2,825                   | 14.0                 |
| 45-54       | 3,250,461               | 1,006            | 30.9          | 21,425,044     | 6,631                   | 30.9                 |
| 55-64       | 2,863,808               | 2,385            | 83.3          | 19,321,882     | 16,091                  | 83.3                 |
| ≥65         | 1,538,873               | 6,509            | 423.0         | 20,351,292     | 85,874                  | 422.0                |
| 65-74       | 929,665                 | 2,540            | 273.2         | 12,349,045     | 33,740                  | 273.2                |
| ≥75         | 609,208                 | 3,969            | 651.5         | 8,002,247      | 52,135                  | 651.5                |
| Women       | 17,319,972              | 20,482           | 118.3         | 125,920,498    | 226,080                 | 179.5                |
| Age         |                         |                  |               |                |                         |                      |
| 18-34       | 5,488,222               | 442              | 8.1           | 36,885,169     | 2,971                   | 8.1                  |
| 35-44       | 3,215,982               | 685              | 21.3          | 20,353,904     | 4,335                   | 21.3                 |
| 45-54       | 3,580,538               | 1,973            | 55.1          | 22,033,807     | 12,141                  | 55.1                 |
| 55-64       | 3,202,749               | 5,053            | 157.8         | 20,755,699     | 32,746                  | 157.8                |
| ≥65         | 1,832,481               | 12,329           | 672.8         | 25,891,919     | 173,886                 | 671.6                |
| 65-74       | 989,461                 | 4,567            | 461.6         | 14,049,245     | 64,846                  | 461.6                |
| ≥75         | 843,020                 | 7,762            | 920.7         | 11,842,674     | 109,040                 | 920.7                |

BrE: bronchiectasis

<sup>†</sup>Number of persons with at least one day of eligibility for health benefits in CY2013

**Online Supplement — Table 4.** Incidence of bronchiectasis among US adults

|             | Study Database          |                                       |                  | US (2013)         |                                |                             |
|-------------|-------------------------|---------------------------------------|------------------|-------------------|--------------------------------|-----------------------------|
|             | Population <sup>†</sup> | Persons with Newly Diagnosed BrE<br>n | Rate<br>per 100K | No. of<br>Persons | No. of Persons<br>with New BrE | Rate of New<br>BrE per 100K |
| All Persons | 23,722,415              | 5,120                                 | 21.6             | 245,273,438       | 69,790                         | 28.5                        |
| Age         |                         |                                       |                  |                   |                                |                             |
| 18-34       | 6,866,011               | 119                                   | 1.7              | 74,980,662        | 1,298                          | 1.7                         |
| 35-44       | 4,420,834               | 174                                   | 3.9              | 40,513,133        | 1,583                          | 3.9                         |
| 45-54       | 5,222,339               | 509                                   | 9.7              | 43,458,851        | 4,202                          | 9.7                         |
| 55-64       | 4,467,087               | 1,296                                 | 29.0             | 40,077,581        | 11,573                         | 28.9                        |
| ≥65         | 2,746,144               | 3,022                                 | 110.0            | 46,243,211        | 51,134                         | 110.6                       |
| 65-74       | 1,575,860               | 1,217                                 | 77.2             | 26,398,290        | 20,491                         | 77.6                        |
| ≥75         | 1,170,284               | 1,805                                 | 154.2            | 19,844,921        | 30,643                         | 154.4                       |
| Men         | 11,277,336              | 2,039                                 | 18.1             | 119,352,940       | 27,434                         | 23.0                        |
| Age         |                         |                                       |                  |                   |                                |                             |
| 18-34       | 3,351,789               | 56                                    | 1.7              | 38,095,493        | 636                            | 1.7                         |
| 35-44       | 2,102,936               | 69                                    | 3.3              | 20,159,229        | 661                            | 3.3                         |
| 45-54       | 2,466,626               | 191                                   | 7.7              | 21,425,044        | 1,659                          | 7.7                         |
| 55-64       | 2,097,735               | 488                                   | 23.3             | 19,321,882        | 4,495                          | 23.3                        |
| ≥65         | 1,258,250               | 1,235                                 | 98.2             | 20,351,292        | 19,983                         | 98.2                        |
| 65-74       | 764,040                 | 499                                   | 65.3             | 12,349,045        | 8,065                          | 65.3                        |
| ≥75         | 494,210                 | 736                                   | 148.9            | 8,002,247         | 11,917                         | 148.9                       |
| Women       | 12,445,079              | 3,081                                 | 24.8             | 125,920,498       | 42,355                         | 33.6                        |
| Age         |                         |                                       |                  |                   |                                |                             |
| 18-34       | 3,514,222               | 63                                    | 1.8              | 36,885,169        | 661                            | 1.8                         |
| 35-44       | 2,317,898               | 105                                   | 4.5              | 20,353,904        | 922                            | 4.5                         |
| 45-54       | 2,755,713               | 318                                   | 11.5             | 22,033,807        | 2,543                          | 11.5                        |
| 55-64       | 2,369,352               | 808                                   | 34.1             | 20,755,699        | 7,078                          | 34.1                        |
| ≥65         | 1,487,894               | 1,787                                 | 120.1            | 25,891,919        | 31,151                         | 120.3                       |
| 65-74       | 811,820                 | 718                                   | 88.4             | 14,049,245        | 12,426                         | 88.4                        |
| ≥75         | 676,074                 | 1,069                                 | 158.1            | 11,842,674        | 18,725                         | 158.1                       |

BrE: bronchiectasis; Dx: diagnosed

<sup>†</sup>Number of persons continuously eligible for health benefits in CY2013

**Online Supplement — Table 5. Prevalence of bronchiectasis among US adults (based on >=1 diagnosis code anytime from 2009-2013)**

|             | Study Database          |                  |               |                |                         |                      |
|-------------|-------------------------|------------------|---------------|----------------|-------------------------|----------------------|
|             | Population <sup>†</sup> | Persons with BrE |               | US (2013)      |                         |                      |
|             |                         | n                | Rate per 100K | No. of Persons | No. of Persons with BrE | Rate of BrE per 100K |
| All Persons | 33,204,504              | 49,214           | 148.2         | 245,273,438    | 521,579                 | 212.7                |
| Age         |                         |                  |               |                |                         |                      |
| 18-34       | 10,744,007              | 1,733            | 16.1          | 74,980,662     | 12,029                  | 16.0                 |
| 35-44       | 6,191,587               | 2,327            | 37.6          | 40,513,133     | 15,135                  | 37.4                 |
| 45-54       | 6,830,999               | 5,477            | 80.2          | 43,458,851     | 34,540                  | 79.5                 |
| 55-64       | 6,066,557               | 12,026           | 198.2         | 40,077,581     | 79,031                  | 197.2                |
| ≥65         | 3,371,354               | 27,651           | 820.2         | 46,243,211     | 380,845                 | 823.6                |
| 65-74       | 1,919,126               | 10,841           | 564.9         | 26,398,290     | 150,180                 | 568.9                |
| ≥75         | 1,452,228               | 16,810           | 1,157.5       | 19,844,921     | 230,665                 | 1,162.3              |
| Men         | 15,884,532              | 17,764           | 111.8         | 119,352,940    | 185,093                 | 155.1                |
| Age         |                         |                  |               |                |                         |                      |
| 18-34       | 5,255,785               | 724              | 13.8          | 38,095,493     | 5,248                   | 13.8                 |
| 35-44       | 2,975,605               | 914              | 30.7          | 20,159,229     | 6,192                   | 30.7                 |
| 45-54       | 3,250,461               | 1,909            | 58.7          | 21,425,044     | 12,583                  | 58.7                 |
| 55-64       | 2,863,808               | 4,114            | 143.7         | 19,321,882     | 27,757                  | 143.7                |
| ≥65         | 1,538,873               | 10,103           | 656.5         | 20,351,292     | 133,313                 | 655.1                |
| 65-74       | 929,665                 | 4,096            | 440.6         | 12,349,045     | 54,409                  | 440.6                |
| ≥75         | 609,208                 | 6,007            | 986.0         | 8,002,247      | 78,905                  | 986.0                |
| Women       | 17,319,972              | 31,450           | 181.6         | 125,920,498    | 336,486                 | 267.2                |
| Age         |                         |                  |               |                |                         |                      |
| 18-34       | 5,488,222               | 1,009            | 18.4          | 36,885,169     | 6,781                   | 18.4                 |
| 35-44       | 3,215,982               | 1,413            | 43.9          | 20,353,904     | 8,943                   | 43.9                 |
| 45-54       | 3,580,538               | 3,568            | 99.6          | 22,033,807     | 21,957                  | 99.6                 |
| 55-64       | 3,202,749               | 7,912            | 247.0         | 20,755,699     | 51,274                  | 247.0                |
| ≥65         | 1,832,481               | 17,548           | 957.6         | 25,891,919     | 247,531                 | 956.0                |
| 65-74       | 989,461                 | 6,745            | 681.7         | 14,049,245     | 95,771                  | 681.7                |
| ≥75         | 843,020                 | 10,803           | 1,281.5       | 11,842,674     | 151,760                 | 1,281.5              |

BrE: bronchiectasis

<sup>†</sup>Number of persons with at least one day of eligibility for health benefits in CY2013



**Online Supplement — Table 6.** Prevalence of bronchiectasis among US adults (based on  $\geq 1$  diagnosis code in 2013)

|             | Study Database          |                  |               |                |                         |                      |
|-------------|-------------------------|------------------|---------------|----------------|-------------------------|----------------------|
|             | Population <sup>†</sup> | Persons with BrE |               | US (2013)      |                         |                      |
|             |                         | n                | Rate per 100K | No. of Persons | No. of Persons with BrE | Rate of BrE per 100K |
| All Persons | 33,204,504              | 25,088           | 75.6          | 245,273,438    | 268,958                 | 109.7                |
| Age         |                         |                  |               |                |                         |                      |
| 18-34       | 10,744,007              | 793              | 7.4           | 74,980,662     | 5,508                   | 7.3                  |
| 35-44       | 6,191,587               | 1,059            | 17.1          | 40,513,133     | 6,891                   | 17.0                 |
| 45-54       | 6,830,999               | 2,645            | 38.7          | 43,458,851     | 16,671                  | 38.4                 |
| 55-64       | 6,066,557               | 6,098            | 100.5         | 40,077,581     | 40,046                  | 99.9                 |
| $\geq 65$   | 3,371,354               | 14,493           | 429.9         | 46,243,211     | 199,841                 | 432.2                |
| 65-74       | 1,919,126               | 5,893            | 307.1         | 26,398,290     | 81,738                  | 309.6                |
| $\geq 75$   | 1,452,228               | 8,600            | 592.2         | 19,844,921     | 118,103                 | 595.1                |
| Men         | 15,884,532              | 8,729            | 55.0          | 119,352,940    | 91,727                  | 76.9                 |
| Age         |                         |                  |               |                |                         |                      |
| 18-34       | 5,255,785               | 338              | 6.4           | 38,095,493     | 2,450                   | 6.4                  |
| 35-44       | 2,975,605               | 423              | 14.2          | 20,159,229     | 2,866                   | 14.2                 |
| 45-54       | 3,250,461               | 902              | 27.7          | 21,425,044     | 5,945                   | 27.7                 |
| 55-64       | 2,863,808               | 1,982            | 69.2          | 19,321,882     | 13,372                  | 69.2                 |
| $\geq 65$   | 1,538,873               | 5,084            | 330.4         | 20,351,292     | 67,094                  | 329.7                |
| 65-74       | 929,665                 | 2,115            | 227.5         | 12,349,045     | 28,094                  | 227.5                |
| $\geq 75$   | 609,208                 | 2,969            | 487.4         | 8,002,247      | 38,999                  | 487.4                |
| women       | 17,319,972              | 16,359           | 94.5          | 125,920,498    | 177,231                 | 140.7                |
| Age         |                         |                  |               |                |                         |                      |
| 18-34       | 5,488,222               | 455              | 8.3           | 36,885,169     | 3,058                   | 8.3                  |
| 35-44       | 3,215,982               | 636              | 19.8          | 20,353,904     | 4,025                   | 19.8                 |
| 45-54       | 3,580,538               | 1,743            | 48.7          | 22,033,807     | 10,726                  | 48.7                 |
| 55-64       | 3,202,749               | 4,116            | 128.5         | 20,755,699     | 26,674                  | 128.5                |
| $\geq 65$   | 1,832,481               | 9,409            | 513.5         | 25,891,919     | 132,747                 | 512.7                |
| 65-74       | 989,461                 | 3,778            | 381.8         | 14,049,245     | 53,643                  | 381.8                |
| $\geq 75$   | 843,020                 | 5,631            | 668.0         | 11,842,674     | 79,104                  | 668.0                |

BrE: bronchiectasis

<sup>†</sup>Number of persons with at least one day of eligibility for health benefits in CY2013
